# Supplementary material for: Cryo-EM reveals the conformational epitope of human monoclonal antibody PAM1.4 broadly reacting with polymorphic malarial protein VAR2CSA
Source: PLOS journal article supplement (doi:10.1371/journal.ppat.1010924), 2022-11-16
Supplement: S4 (10.1371/journal.ppat.1010924.s004) [file journal.ppat.1010924.s004]

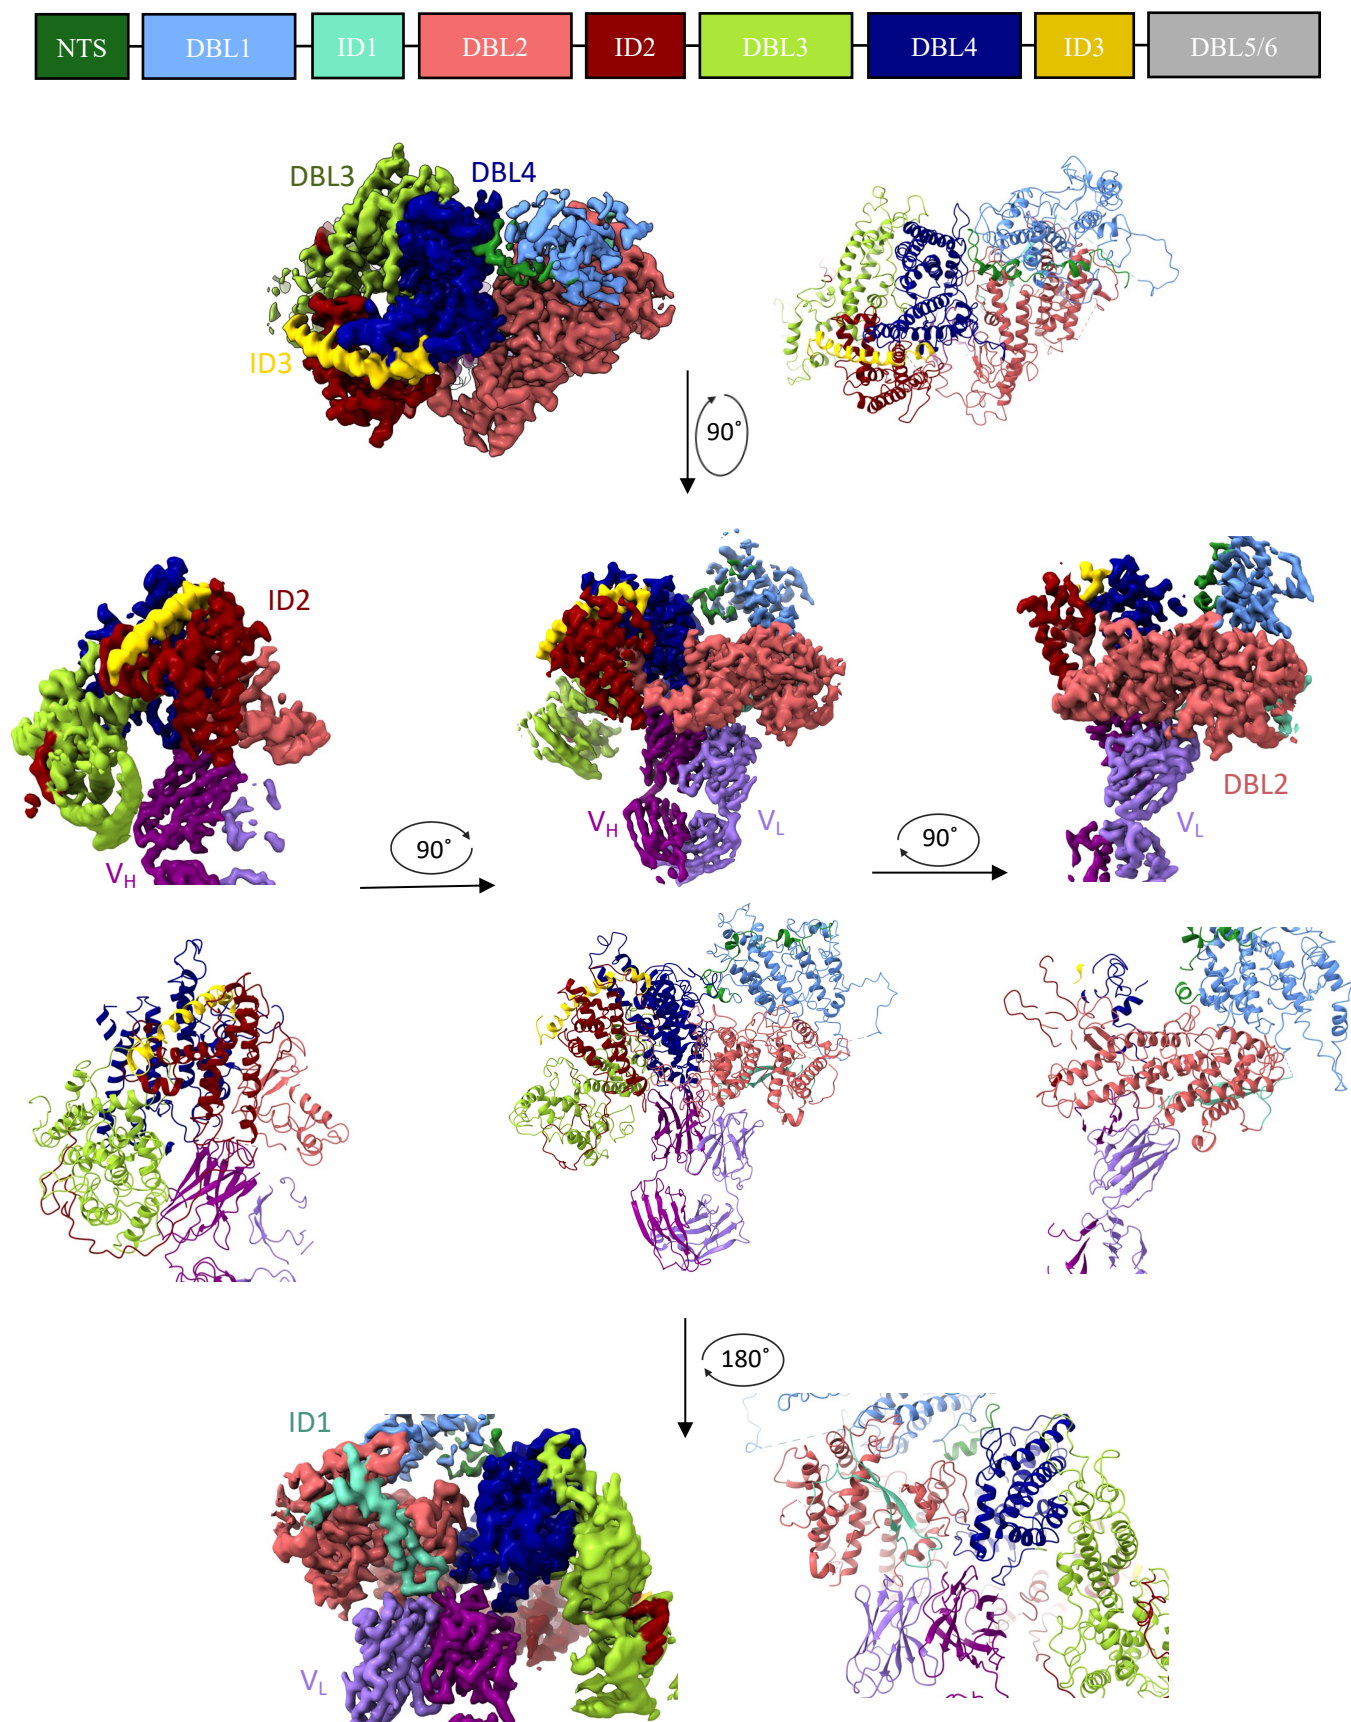

**S4 Fig.** Different set of views of VAR2CSA + PAM1.4 Fab cryoEM density map and its corresponding refined ribbon model
